# Supplementary material for: Reactable ionic liquid-assisted rapid synthesis of BiOI hollow microspheres at room temperature with enhanced photocatalytic activity
Source: Royal Society of Chemistry journal article supplement (doi:10.1039/c4ta02400a), 2014-07-07
Supplement: c4ta02400a1.pdf [file c4ta02400a1.pdf]

## Supplementary Information

### **Reactable ionic liquid assisted rapid synthesis of BiOI hollow microspheres at room temperature with enhanced photocatalytic activity**

Jun Di<sup>a</sup>, Jiexiang Xia<sup>a,\*</sup>, Yuping Ge<sup>a</sup>, Li Xu<sup>a</sup>, Hui Xu<sup>b</sup>, Minqiang He<sup>a</sup>, Qi Zhang<sup>a</sup>,  
Huaming Li<sup>a,\*</sup>

<sup>a</sup>School of Chemistry and Chemical Engineering, Jiangsu University, 301 Xuefu Road,  
Zhenjiang, 212013, P. R. China

<sup>b</sup>School of the Environment, Jiangsu University, Zhenjiang 212013, P. R. China

**\*Corresponding author:** Tel.:+86-511-88791108; Fax: +86-511-88791108;

E-mail address: xjx@ujs.edu.cn; lhm@ujs.edu.cn

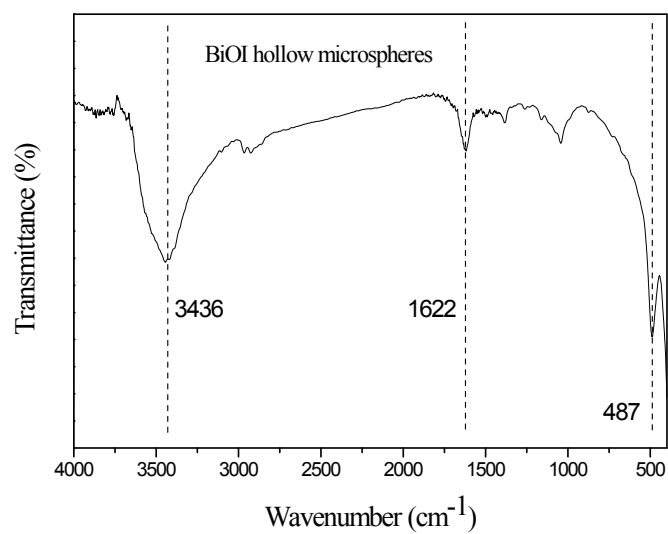

**Figure S1** FT-IR spectra of BiOI hollow microspheres synthesized by [Bmim]I ionic liquid.

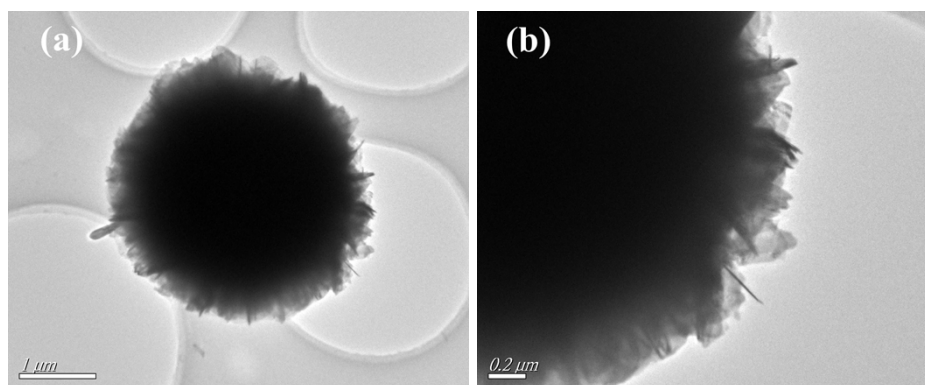

**Figure S2** TEM images of the BiOI hollow microspheres synthesized by ionic liquid [Bmim]I after the dropwise addition completed and without further stirred.

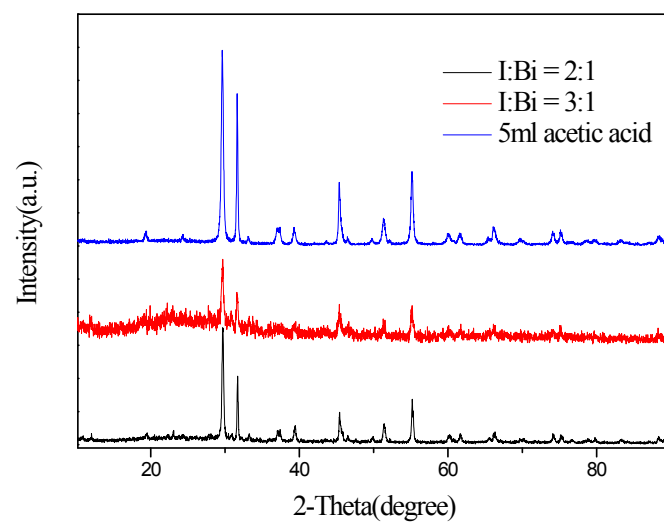

**Figure S3** XRD pattern of BiOI samples synthesized by ionic liquid [Bmim]I with different I:Bi ratio and the amount of acetic acid.

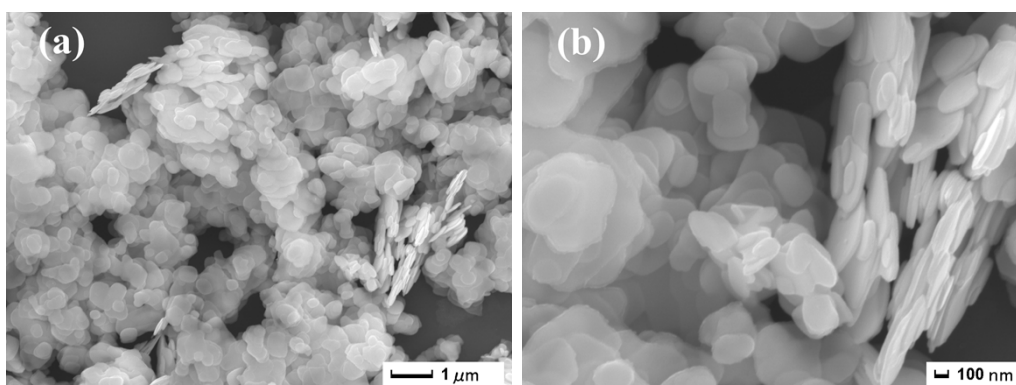

**Figure S4** SEM images of the BiOI sample synthesized by ionic liquid [Bmim]I with I:Bi ratio was 2:1.

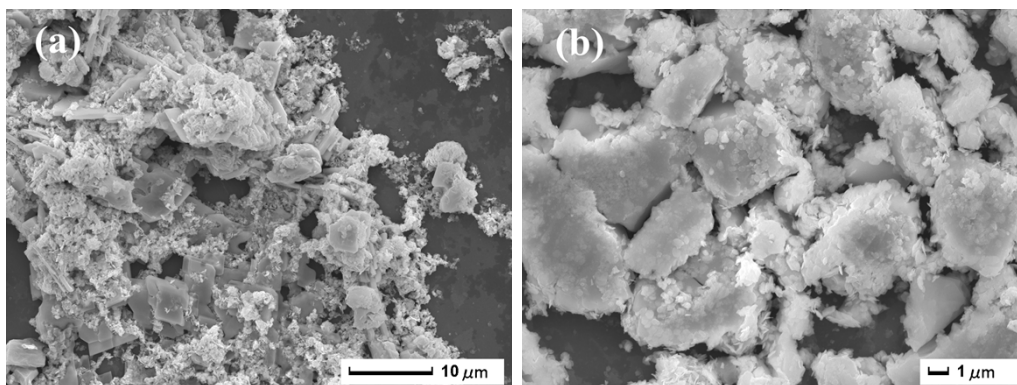

**Figure S5** SEM images of the BiOI sample synthesized by ionic liquid [Bmim]I with I:Bi ratio was 3:1.

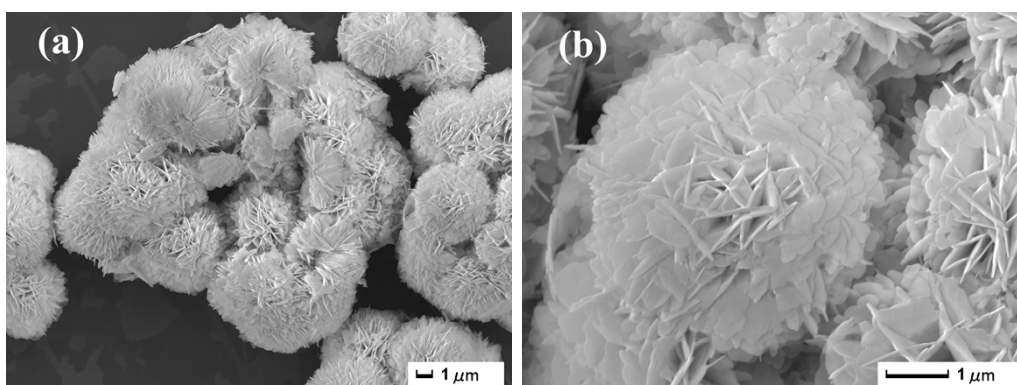

**Figure S6** SEM images of the BiOI sample synthesized by ionic liquid [Bmim]I with the amount of acetic acid was 5 ml.

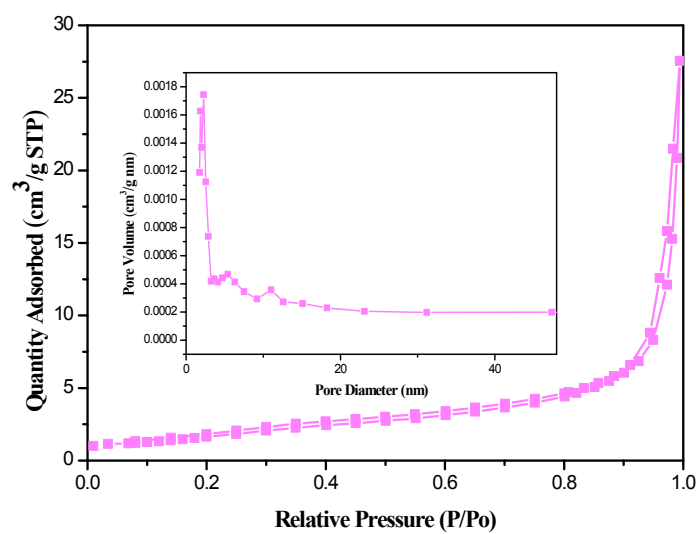

**Figure S7** Nitrogen absorption-desorption isotherms of BiOI nanosheets synthesized by using KI.

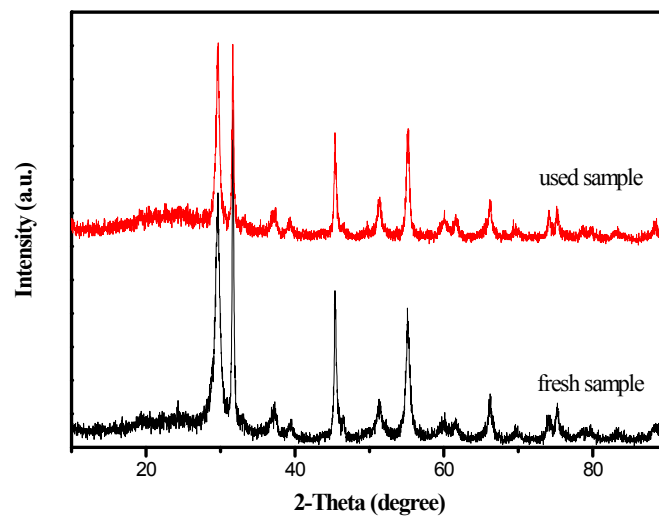

**Figure S8** XRD patterns of the BiOI hollow microspheres before and after the photocatalytic experiments.

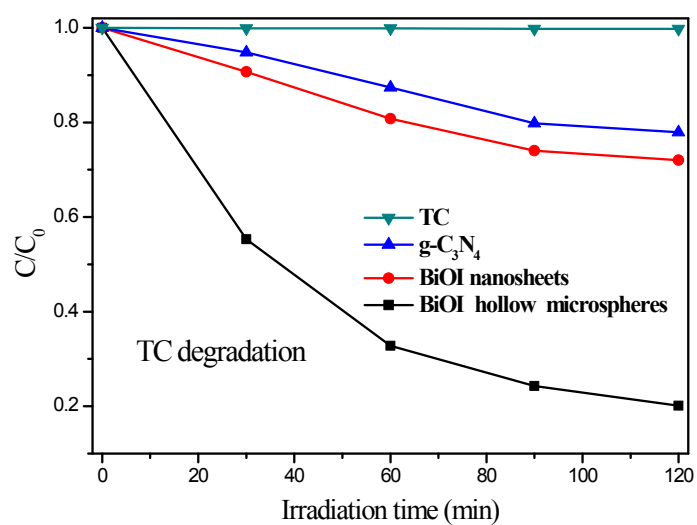

**Figure S9** Photocatalytic degradation of TC in the presence of BiOI hollow microspheres, BiOI nanosheets and g-C<sub>3</sub>N<sub>4</sub> under visible light irradiation.

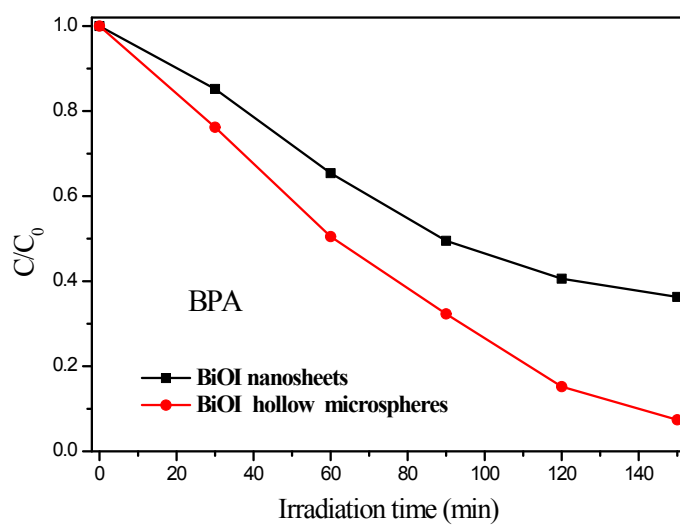

**Figure S10** Photocatalytic degradation of BPA in the presence of BiOI hollow microspheres and BiOI nanosheets under visible light irradiation.

| Series | Photocatalyst                   | The first order<br>kinetic equation | $k$<br>( $min^{-1}$ ) | $R^2$  |
|--------|---------------------------------|-------------------------------------|-----------------------|--------|
| 1      | BiOI hollow microspheres        | $-\ln(C/C_0)=0.0238 t$              | 0.0238                | 0.9901 |
| 2      | BiOI nanosheets                 | $-\ln(C/C_0)=0.0059 t$              | 0.0059                | 0.9988 |
| 3      | TiO <sub>2</sub>                | $-\ln(C/C_0)=0.0023 t$              | 0.0023                | 0.9913 |
| 4      | g-C <sub>3</sub> N <sub>4</sub> | $-\ln(C/C_0)=0.0012 t$              | 0.0012                | 0.9932 |

**Table S1** Pseudo-first-order rate constant for RhB photocatalytic oxidation under different photocatalysts
